# Supplementary material for: Neurotrophins promote revascularization by local recruitment of TrkB+ endothelial cells and systemic mobilization of hematopoietic progenitors
Source: JCI journal article supplement (doi:10.1172/jci22655), 2005-03-01
Supplement: sd1 [file 1]

301 Moved Permanently

# Moved Permanently

The document has moved here.
